# Supplementary material for: CuCl2and stainless steel synergistically assisted synthesis of high-purity silver nanowires on a large scale
Source: Royal Society of Chemistry journal article supplement (doi:10.1039/c4ra09317h), 2014-09-30
Supplement: c4ra09317h1.pdf [file c4ra09317h1.pdf]

## Supporting Information

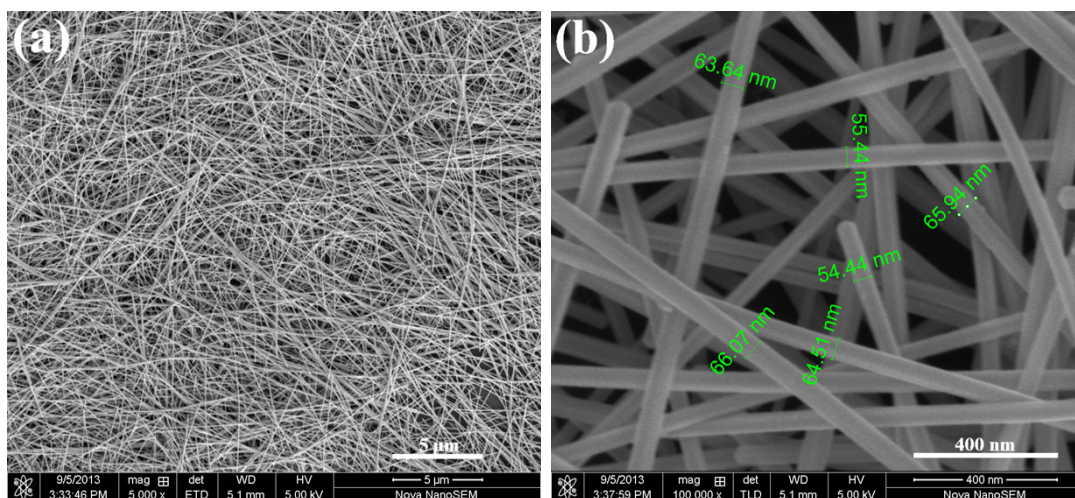

Fig. 1S SEM images of AgNWs synthesized in the presence of NaCl and stainless steel under Argon atmosphere.

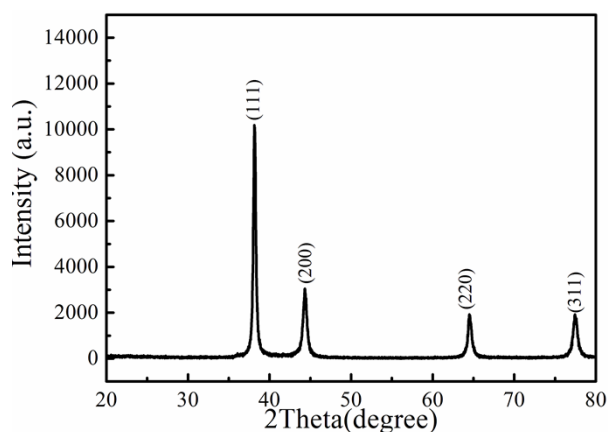

Fig. 2S XRD pattern of AgNWs synthesized in the presence of CuCl<sub>2</sub> and stainless steel.

XRD pattern in Fig. 2S shows that four diffraction peaks correspond to (111), (200), (220) and (311) planes of pure face-centered-cubic Ag crystals. It is noticed that the intensity ratio of (111)/(200) shows a relatively high value of 3, directing an enrichment of {111} crystalline planes in the AgNWs.<sup>1</sup>

### Notes and references

- (a) S. H. Liu, B. M. Sun, J. G. Li and J. L. Chen, *Cryst. Eng. Comm.*, 2014, **16**, 244; (b) L. Y. L. Wu, W. T. Kerk and C. C. Wong, *Thin. Solid. Films.*, 2013, **544**, 427.
